# Supplementary material
Source: Research Square preprint supplement (doi:10.21203/rs.3.rs-9224585/v1)
Supplement: Supplementary file 1 [file 00d2cd250ac69cc24453c71b.docx]

| **SNP ID** | **Position** | **Ref** | **Alt** | **Variant type** | **AF (SH-SY5Y)** | **Reported/possible impact** |
| --- | --- | --- | --- | --- | --- | --- |
| **rs762551** | 74749576 | C | A | Intron | 0.6298 | CYP1A2*1F; increased inducibility (32) |
| **rs2472304** | 74751897 | G | A | Intron | 0.2380 | Potential splicing/regulatory role (33) |
| **rs2470890** | 74755085 | T | C | Synonymous | 0.7638 | Expression changes; clozapine side effects (34) |
| **rs33923017** | 74755461–2 | – | TT | 3′ UTR | 0.2647 | Potential impact on transcript stability |
