# Supplementary material
Source: Research Square preprint supplement (doi:10.21203/rs.3.rs-9224585/v1)
Supplement: Supplementary file 3 [file 50b026e4ac2be07798bd4204.docx]

**Supplementary material**

**Figure S1.** HiFi read-length distribution after CCS processing and QC filtering. Histogram shows the frequency of HiFi reads by length. The distribution is unimodal with a peak around ~12–14 kb and a right-skewed tail extending to longer reads (up to ~60 kb), indicating successful recovery of predominantly long reads for downstream analyses.

**Figure S2.** HiFi read length and quality metrics supporting downstream variant calling. (A) Distribution of PacBio HiFi read lengths for ~30× whole-genome sequencing, with a median read length of 13.9 kb. (B) Distribution of HiFi per-read quality scores (Phred), with a median Qscore of 39. HiFi reads passing QC were used for alignment to GRCh38 and subsequent SNV/indel and structural variant calling.

**Figure S3.** Representative IGV view of CYP3A5 rs776746 (CYP3A5*3) in SH-SY5Y HiFi WGS data. Coverage and aligned reads are shown across the rs776746 locus (GRCh38, chr7:99,672,916), a canonical intron 3 splice variant defining the CYP3A5*3 allele. The vertical marker indicates the variant position, illustrating read-level support used to confirm the called genotype.
