# Supplementary material
Source: Research Square preprint supplement (doi:10.21203/rs.3.rs-9224585/v1)
Supplement: Supplementary file 4 [file ad9f7b7278328534e7a25f19.docx]

| **Gene** | **Diplotype (star alleles)** | **Predicted phenotype** | **Notes / source (Defining variant(s) → Curated mapping → Practical implication)** |
| --- | --- | --- | --- |
| **CYP1A2** | Key allele present: *1F (rs762551) | Baseline activity; increased inducibility (context-dependent) | *rs762551 (1F) → linked to higher inducibility under environmental inducers → interpret as reference-like baseline with potentially amplified induction response; report AF (SH-SY5Y reads) rather than MAF. |
| **CYP2A6** | *9 / *1 | Intermediate metabolizer | *rs28399433 (−48T>G; 9) → curated as reduced expression allele → expect partial reduction of CYP2A6 capacity (notably nicotine clearance) vs *1/*1 baseline. |
| **CYP2B6** | *1 / *1 | Normal (extensive) metabolizer | Reference star alleles (no defining decreased-function allele detected) → curated as NM → use as baseline CYP2B6 background for efavirenz/methadone-related mechanistic assays. |
| **CYP2C8** | *1 / *1 | Normal metabolizer | Reference star alleles (no *2/*3/*4 signals in star call) → curated as NM → interpret as canonical CYP2C8 capacity (e.g., paclitaxel/repaglinide substrates). |
| **CYP2C9** | *1 / *1 | Normal metabolizer | Reference star alleles (no *2/*3 in star call) → curated as NM → interpret as baseline CYP2C9 capacity for classic substrates (e.g., S-warfarin, phenytoin, NSAIDs). |
| **CYP2C19** | *17 / *17 | Ultrarapid metabolizer | *rs12248560 (−806C>T; 17) → curated gain-of-function → expect increased CYP2C19 metabolic capacity vs *1/*1 baseline (notably PPIs/selected antidepressants/benzodiazepines). |
| **CYP2D6** | *1 / *1 (single copy) | Normal metabolizer | Long-read + CNV context consistent with no duplication/deletion → curated as NM → interpret as baseline CYP2D6 background (no reduced/no-function alleles; no increased activity from duplications). |
| **CYP2E1** | (no star call stated) | No disruptive coding variants detected; activity likely preserved (expression may be modulated) | Predominantly non-coding/intronic + 5′UTR and 3′UTR (rs2480256/rs2480257) variants; no coding LoF/missense highlighted → interpret as intact catalytic potential with possible expression/inducibility modulation by regulatory variation. |
| **CYP3A4** | *1 / *1 | Normal metabolizer | Reference star alleles → curated as NM → interpret as canonical CYP3A4 capacity for broad substrate space; if *rs2740574 (1B) is present, functional evidence is inconsistent/context-dependent, so avoid strong functional claims. |
| **CYP3A5** | *3 / *3 | Poor metabolizer (no-function) | *rs776746 (3; splice defect) → curated no-function / non-expresser → expect minimal CYP3A5 contribution; CYP3A-dependent metabolism in this model is expected to be CYP3A4-dominant. |
