# Supplementary material
Source: Research Square preprint supplement (doi:10.21203/rs.3.rs-9224585/v1)

# HiFi-reads Length Distribution Diagram

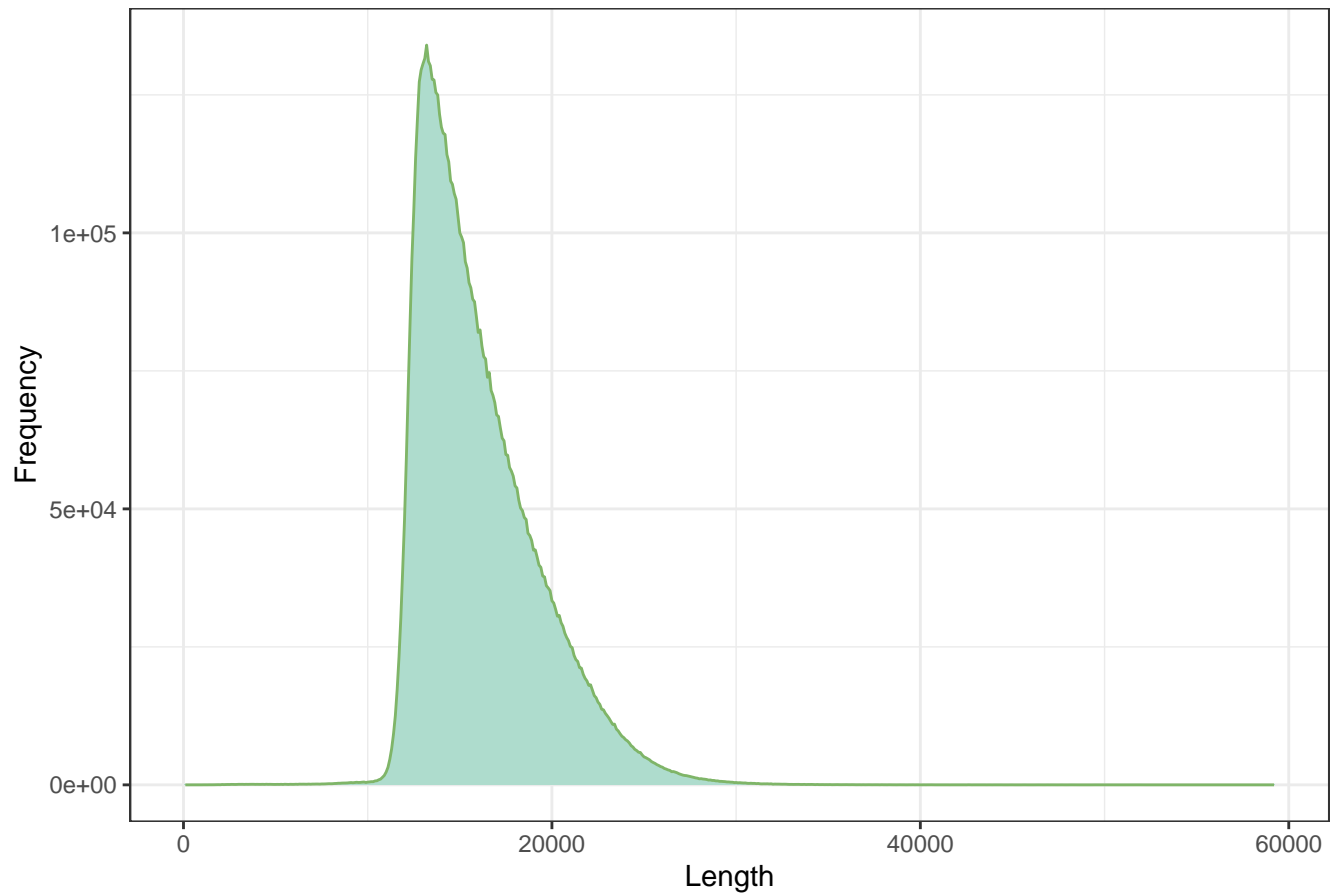

Supplement: Supplementary file 2 [file 33cb30f857f0005911971d01.pdf]
